# Supplementary material
Source: PubMed Central journal article supplement (PMC5827587)
Supplement: ASN.2016121322SupplementaryData2.pdf [file ASN.2016121322SupplementaryData2.pdf]

## **SIGNIFICANCE STATEMENT**

*APOL1* variants are associated with kidney diseases in African ancestral populations; yet, the underlying mechanisms are unknown. Although *APOL1* is normally expressed in podocytes, data from cell culture and animal models suggest *APOL1* variant-dependent cytotoxicity mediates kidney disease. This study shows that *APOL1* cytotoxicity is variant-independent and related to *APOL1* expression levels. At expression levels that are cytotoxic, *APOL1* assembles pH-sensitive cation channels on plasma membranes. Stable *APOL1* expression is achievable in model systems without variant-dependent differences in cytotoxicity, autophagy, or channel activity. Absence of variant-dependent cell death or cytotoxicity at physiologic expression levels suggests increased cytotoxicity of *APOL1* variants does not drive disease progression in humans and alternative mechanisms should be explored.
